# Supplementary material for: A Performance-Based Approach to Quantify Atmospheric River Flood Risk
Source: Copernicus journal article supplement (doi:10.5194/nhess-2021-337), 2021-11-12
Supplement: Supplementary file [file nhess-2021-337-AC2-supplement.pdf]

## Authors response to Anonymous Referee #2

Review for Bowers et al.

### 2.1)

This paper provides a framework (PARRA) to quantify Atmospheric River flood risk using performance-based submodules for Sonoma County, CA. The methodology is described in detail, and a case study from a 2019 AR event was investigated. The PARRA framework is very interesting and useful for providing a mean estimate of expected losses with uncertainty bounds.

We would like to thank the reviewer for their valuable feedback and constructive comments. We have revised the manuscript accordingly and provided detailed responses to each of the comments below.

### 2.2)

However, I have some concerns about the methodology and the way it was described in the manuscript. I also have some concern about the 2019 case study that was investigated – why choose a case study that the PARRA framework barely captures in the tail of its distribution? Why not show a case study that the PARRA framework captures much better?

Response: We acknowledge the reviewer’s concerns about both the results of the 2019 case study and the way it was described in the manuscript, and we thank the reviewer for helping us to significantly clarify our presentation of both. We will address these two concerns separately.

First, we recognize that we did not provide enough support to demonstrate that the extremeness of the 2019 event was well represented by the various component model implementations. We agree with the reviewer that presenting additional case studies helps to strengthen this point for future readers. We have therefore added additional case study events to the discussion of precipitation in Sect. 3.2.2 and to the discussion of losses in Sect. 3.7.2. We have included the new versions of each of these sections below. For readers who want to dig deeper into our results and methodology, we will add results for many more AR events to our next Github code release, as referenced in our response to comment 2.18.

### NEW SECT. 3.2.2

*“We present a comparison of observed vs. simulated precipitation values for four AR events. Figs. 5(a-b) are the two most recent Category 3 (strong) ARs in the historic catalog, and Figs. 5(c-d) are the two most recent Category 5 (exceptional) ARs. The dashed lines mark the recorded precipitation totals for each event and the tick marks along the top of the panel show the recorded totals from all ARs in the historic catalog in the same intensity category. For each*

*event we generated 1,000 Monte Carlo realizations of precipitation given the observed maximum IVT and duration and plotted the resulting distribution as a histogram. The histograms represent realizations of potential precipitation if another AR occurred in Sonoma County with the same characteristics. We do not expect the observed dashed lines to fall in the center of the simulated distributions; rather, the observed values can be thought of as random samples from the simulated distributions, and comparing the two offers new insights into the character of specific ARs.*

*“For example, Figs. 5(a) and 5(c) show two impactful storms for Sonoma County, from February 2019 and January 2017, respectively. The February 2019 event caused approximately \$155 million in total damage (Chavez, 2019) and the January 2017 event caused approximately \$15 million (County of Sonoma, 2017). While both events had precipitation totals in excess of 200 mm, the precipitation relative to the event-specific maximum IVT and duration was far higher in February 2019 than January 2017. The January 2017 event was a Category 5 AR, meaning it had the greatest potential for hazardous impacts. Conditioned on the intense atmospheric conditions, though, the observed precipitation was near the mean of the simulated distribution in Fig. 5(c).*

*“Figure 5(a) shows the predicted precipitation distribution for a Category 3 AR (mixture of beneficial and hazardous impacts) with the same maximum IVT and duration as was observed in February 2019. By all accounts, though, the February 2019 event was a very hazardous storm with severe impacts for communities in the study area. The observed precipitation is at the upper tail of what we would expect for a Category 3 event in both the observed distribution (shown in the tick marks at the top of the plot) and the simulated distribution (shown in the histogram). Therefore we infer that the precipitation is likely one of the drivers that led this particular AR to become a damaging event. In summary, the PARRA simulation results provide evidence that the January 2017 event was a moderate precipitation conditioned on extreme AR hazard while the February 2019 event was an extreme precipitation conditioned on more moderate AR hazard. These are two distinct pathways ARs can take to generate significant consequences.*

*“We perform a similar comparison between Fig. 5(b) (January 2019) and Fig. 5(d) (October 2016). Neither of these was an “impactful” storm: there were no state or federal disaster declarations, limited news coverage, and no reported loss totals. Both events had observed precipitation totals of about 90 mm, less than half the amounts seen in Figs. 5(a) and 5(c). The observed total was in the middle of the simulated distribution for the Category 3 event in January 2017 but was on the low end for the Category 5 event in October 2016. The simulated results indicate that the AR event in October 2016 could have produced far more precipitation, and potentially far greater consequences in the study area, than what was actually realized. An interesting line of future research would be to examine these “near misses” to understand what factors drive certain events to produce extreme impacts and not others.”*

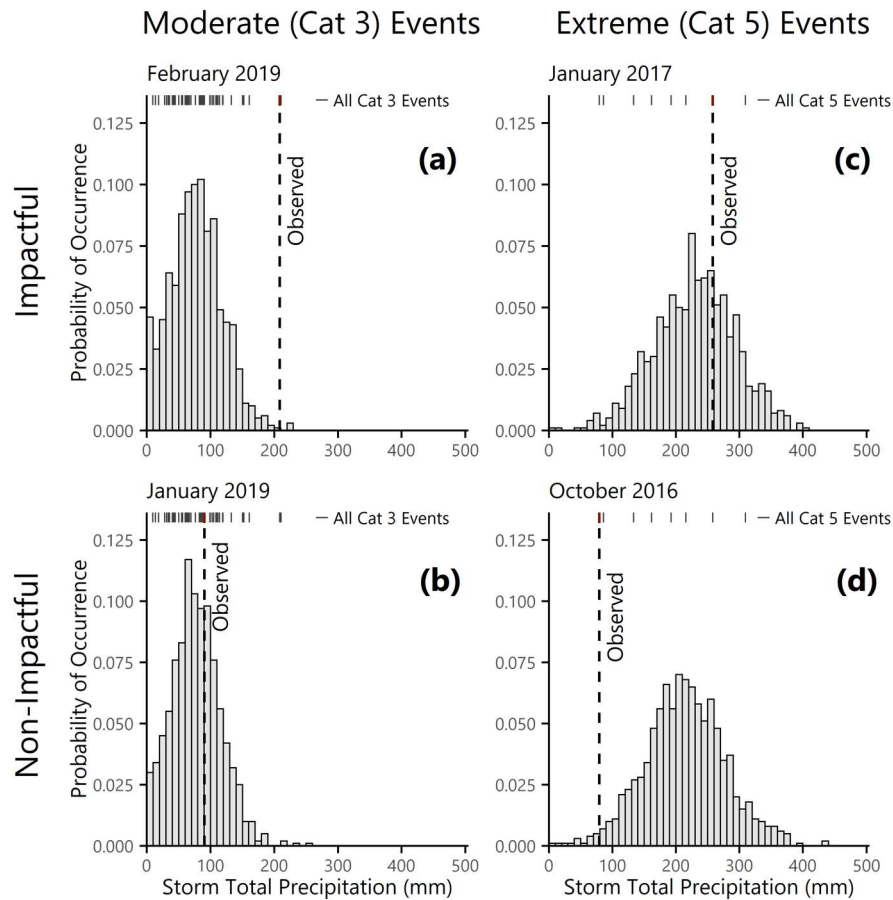

*New precipitation figure (previously part of Figure 4).*

*Caption: “Precipitation realizations for case study events. Distribution of simulated precipitation realizations including uncertainty for AR events occurring in (a) February 2019, (b) January 2019, (c) January 2017, and (d) October 2016. Events are labelled by their Ralph et al. (2019) intensity category (left vs. right) and impact level (top vs. bottom). The observed precipitation for each event is marked by a dashed vertical line, and the tick marks along the top of each panel show how the observed values compare to precipitation totals from other AR events in the same intensity category.”*

### NEW SECT. 3.7.2

(Note: this section has been moved to Section 4.1, “Scenario Events” in the revised manuscript)

*“We consider loss distributions for the Category 3 AR from February 2019 and the Category 5 AR from January 2017, both introduced in Sect. 3.2. Given the observed maximum IVT and duration values and the “observed” soil moisture values for our scenario events, we ran all the component models in sequence and generated 10,000 probabilistic loss realizations to estimate the distribution of potential loss outcomes. These are the flood losses that could have occurred*

for each event if realizations of the other pinch point variables had been different; i.e., if the precipitation total had been lower (see Fig. 5), if the streamflow peak had lasted longer (see Fig. 6), etc. We compare the observed vs. simulated losses and examine how the losses were spatially distributed within the study area.

“The histogram of simulated loss realizations for the February 2019 event is shown in Fig. 9(a). The observed maximum IVT was  $620 \text{ kg m}^{-1} \text{ s}^{-1}$  and the observed duration was 57 h. The vertical dashed line marks \$91.6 million, the estimate of true losses experienced by residential buildings in Sonoma County (Chavez, 2019). The PARRA framework estimates this historical event to have been an 89<sup>th</sup> percentile loss event based on the driving AR characteristics. We have previously stated that the February 2019 event was a moderate storm in atmospheric terms that generated severe hydrologic and economic effects. There is significant selection bias to consider when looking at this case study event, because by definition the noteworthy events in the historic catalog are those with the highest impacts. If we understand the true loss to be only one stochastic realization out of the set of all possible losses, and we consider that the event was selected because of the severity of its observed impacts, it is reasonable that the observed loss estimate comes from the upper tail of the simulated distribution. Note also that while the loss for the February 2019 event was higher than expected for its AR characteristics and antecedent conditions, approximately 10% of the simulations produced even more extreme losses. Our results indicate that the observed loss of \$91.6 million is not necessarily the worst-case scenario of what we could have seen

“Figure 9(b) shows the simulated and observed loss results for the Category 5 AR occurring in January 2017. This event had a maximum IVT of  $1,173 \text{ kg m}^{-1} \text{ s}^{-1}$  and a duration of 78 h, much larger than February 2019. However, this AR was one of the first major precipitation events in the 2017 water year, which came after multiple years of drought conditions in northern California. The observed loss thus falls at the low end (9<sup>th</sup> percentile) of what was expected for an AR of this magnitude. The January 2017 event was also the first in a series of strong to exceptional ARs that lasted about six weeks and led to severe statewide consequences, notably a damaging overflow event at the Anderson Dam in San Jose and a spillway failure at the Oroville Dam that led to emergency evacuation of almost 200,000 people. The 2017 AR sequence underscores the importance of initial conditions in the modeling of extreme events in northern California. While the PARRA framework captures initial soil moisture conditions, it does not currently capture sequential and compounding events. This could be included in future implementations of the PARRA framework and is an interesting potential avenue for future exploration.

“Because of the probabilistic nature of the PARRA framework, its strength lies not in the reproduction of specific past events, but in quantifying total risk and assessing the relative differences between alternative decision pathways. The results in Fig. 9(a) assume that no

*information is known about the storm other than the maximum IVT, duration, and soil moisture. However, AR forecasts now typically include an estimate of the expected regional precipitation total. If we had perfect information about total precipitation (i.e., we could predict in advance exactly what the observed value would be) we could start the PARRA framework at the precipitation pinch point variable PRCP and run all subsequent component models in the sequence probabilistically. Figure 9(c) is therefore an exploration of a “what-if” scenario where losses are conditional on the observed precipitation value from February 2019 rather than the AR characteristics. While the observed \$91.6 million loss estimate is similarly extreme in this case (91<sup>st</sup> percentile event vs. 89<sup>th</sup>) and the tail behavior of the two distributions is about the same, the body of the distribution in Fig. 9(c) shifts to larger losses, and the probability of seeing zero-loss events nearly disappears. Calculating the differences between the loss distributions conditioned on different sets of input information can serve to quantify the value of more accurate AR forecasting tools for the study area.*

*“Figure 10 shows the spatial distribution of building losses from the February 2019 event, averaged across all Monte Carlo realizations and aggregated to the census block group level. Losses are concentrated along the banks of the Russian River with hotspots near Healdsburg, Guerneville, and the mouth of the river near the Pacific Ocean. These locations received warnings and evacuation orders before and during the storm event. While these particular communities are already known to have high vulnerability to flooding, the PARRA simulation results offer a new way to quantitatively prioritize investments in flood mitigation, from emergency communications to infrastructure projects to high-resolution modeling.”*

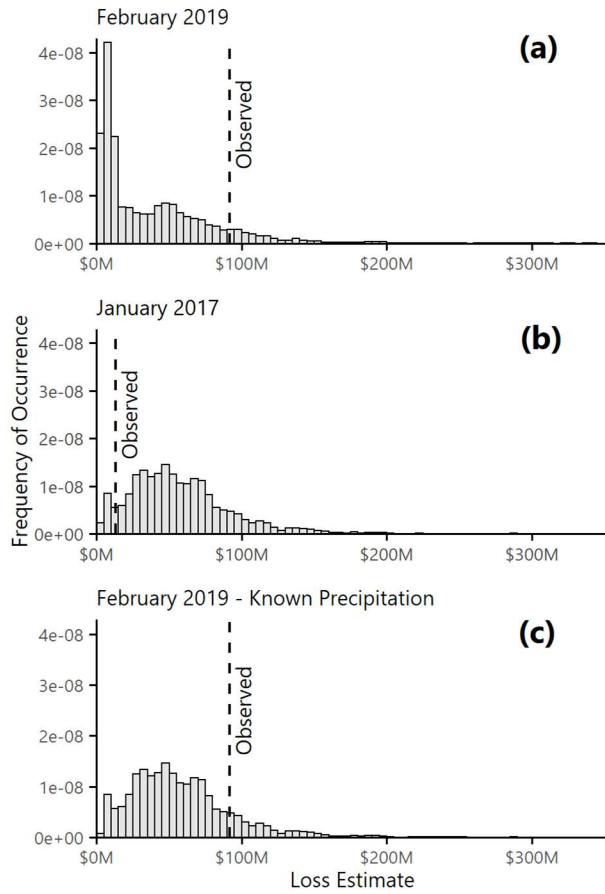

*Revised Figure 9.*

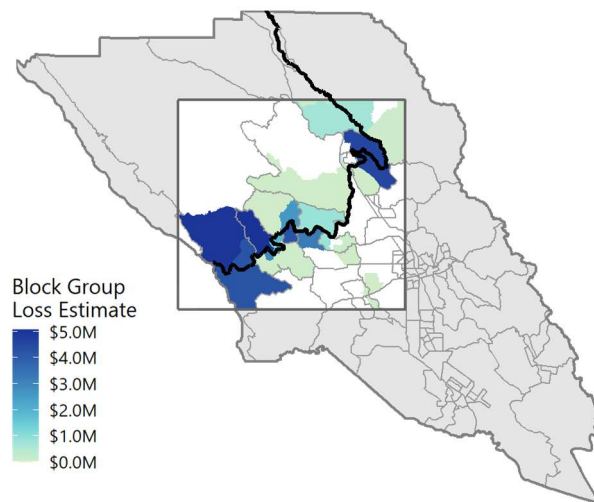

*New Figure 10 (previously part of Figure 9).*

We would also like to note that due to a calculation error identified by Reviewer 1, the 2019 observed loss estimate now falls at the 89<sup>th</sup> percentile of the simulated distribution rather than the

98<sup>th</sup> percentile that was reported in the original version of the manuscript. This numerical correction, in addition to the more nuanced discussion of selection bias in the new version of Section 3.7.2, may alleviate some of the reviewer's concerns about the 2019 event being barely captured within the simulated distribution.

Regarding the reviewer's second concern about the description of the 2019 event case study, we recognize that we were not clear enough in describing its purpose. Our intent was not to reproduce the 2019 event exactly, but to use the mean and uncertainty of the simulated distributions to gain insight into the extremeness of this AR event, and that having an observed value fall in the upper tail of the simulated distribution is an interesting scientific result rather than an indication of poor model agreement. We have added discussion of the 2019 event in the new version of Sect. 3.2.2. We have also modified the manuscript in several places to remove all references to the 2019 event as a validation exercise and instead characterize it as a comparison, as summarized below.

- Line 11: The sentence "Evaluation of a case study AR event..." was removed and replaced with the following.

*"Individual component models are fit and validated against a historic catalog of AR events occurring from 1987-2019. Comparing simulated results from these component model implementations against observed historic ARs highlights what we can learn about the drivers of extremeness in different flood events by taking a probabilistic perspective."*

- Lines 198-206: We have removed these paragraphs and added the following new text.

*"Within Sonoma County we use the PARRA framework to examine the drivers and impacts of historical AR events. Each of the six subsections below corresponds with one of the pinch point variables defined in Sect. 2 and is divided into two parts. The first part of each subsection describes the user choices made to represent the study area within each component model. While we include many of the specific details related to fit and validation of these model implementations, the focus is on the overall workflow and how to functionally apply the PARRA framework. The second part of each subsection compares simulated Monte Carlo realizations of pinch point variables to observed data. These comparisons can be seen as a forensic reconstruction rather than an attempt to replicate the observed values. We focus on the new knowledge gained from the model implementations about how the observed values fall within the range of "what might have been."*

*"We present two types of case studies to showcase the breadth and depth of insights that are possible in a model-by-model analysis. For breadth, we compare and contrast observed vs. simulated precipitation values for four different AR events. We examine storms with varying AR intensity categories to determine which storms displayed "average" behavior for their category*

*and which exceeded predicted impacts. For depth, we focus the discussion for all other pinch points on a single Category 3 AR from February 2019, referred to as the February 2019 event. This event's recency combined with its severe impact mean that datasets unique to this event are available to compare many of the individual component model implementations against ground-truth observations, allowing a more focused analysis. Comparisons and results for additional storms can be found in the supplemental code release referenced at the end of the paper."*

- Line 373: The sentence "We examine three different strategies..." has been modified as follows.

*"Because the N-dimensional inundation pinch point variable \$INUN\$ contains significantly more data than we have generated thus far, we explore three strategies to compare the observed and simulated inundation maps."*

- Line 387: The sentence "Our LISFLOOD model..." has been modified as follows.

*"Our LISFLOOD model was able to reproduce the Sonoma GIS map with a critical success index of 67.77%, which indicates that the observed inundation is within the range of what we would reasonably predict given the observed hydrograph."*

- Line 408: The sentence "Because there was little..." has been modified as follows.

*"Because there was little available in the way of site-specific damage information, we used building safety as a proxy variable to facilitate investigation of observed vs. predicted damage."*

- Line 604: The sentence "We performed a step-by-step comparison..." has been modified as follows.

*"We performed step-by-step comparisons between each of these component models and ground-truth data from the case study AR events to show how the differences between the observed and simulated values produced new insights about what drove certain events towards extreme consequences and not others."*

- Line 607: The sentence "The total losses to residential homes..." has been removed.

## **2.3)**

I have some comments below that can help improve the paper. I think the paper can be accepted after some minor revisions and clarifications.

Response: We would like to thank the reviewer for their recommendation, and for the time and effort spent reviewing this manuscript.

General Comments



#### 2.4)

What would the PARRA framework provide a stakeholder as the estimated losses for the 2019 AR event?

Response: We thank the reviewer for this insightful question. Communicating what communities can gain from implementing the PARRA framework locally is central to its adoption. We believe that the most powerful result from our modeling approach is the ability to generate a loss exceedance curve (Fig. 11). The loss exceedance curve provides insight into the overall character of the study area's flood risk, as stated in Lines 610-615 of the manuscript. This is a novel result made possible by the PARRA framework's ability to analyze potential losses over large stochastic event records.

We believe the strengths of the PARRA framework are not necessarily in forecasting or reproducing losses for individual events, but rather in drawing relative comparisons between different scenarios and designing to performance-based targets. We have emphasized the utility of relative comparisons in the new version of Sect. 3.7.2 included in our response to comment 2.2, especially in the paragraph describing Fig. 9(c). We have modified the description of the mitigation exercise presented in Sect. 4.3 to better highlight the utility of the performance-based approach. We have removed the paragraph starting at Line 508 and replaced it with the following text:

*“A benefit of taking a performance-based approach is the ability to set a specified performance objective, such as loss reduction, and determine what changes can be made to the hazard, exposure, and vulnerability to reach that target. Working backwards to design a system that meets a set performance target is a powerful and unique capability of performance-based frameworks. Here we demonstrate the performance-based aspect of the PARRA framework through a hypothetical mitigation analysis. We define a target loss reduction threshold of reducing the AAL by half, and we assess the effectiveness of home elevation as a pathway to meet that threshold. We then quantify the effects of the system changes on the shape of the loss exceedance curve to highlight the framework's capability to prospectively assess events without historical precedent.”*

We believe that this response, coupled with our response to comment 2.2 above, serves to additionally resolve the concerns and questions expressed by the reviewer in comments 2.5, 2.20, 2.33, and 2.34.

#### 2.5)

The results show an average loss of about \$25 million (Figure 9a), but the actual cost was \$91.6 million. This actual cost is covered in the tail of the distribution provided by PARRA but is far from the mean of this distribution. Do the authors consider this an accurate assessment? Some

comments on how to interpret the results with their associated uncertainties, as well as how to interpret the acceptability of the results, would be helpful.

[Response: Please see our responses to comments 2.2 and 2.4, where we discuss the accuracy of the case study assessment and stakeholder interpretation of the case study results, respectively.](#)

## Specific Comments / Technical Corrections

### Section 1 Introduction

#### 2.6)

Line 27: Pineapple express is not the only mechanism that brings ARs to California.

[Response: We acknowledge the reviewer's suggestion and we have removed this sentence from the manuscript.](#)

#### 2.7)

Line 56: "... understanding climatology of ARs", see Espinoza et al. 2018 and Massoud et al. 2019 who aimed to understand AR climatology in a global context.

(a) Espinoza, Vicky, Duane E. Waliser, Bin Guan, David A. Lavers, and F. Martin Ralph. "Global analysis of climate change projection effects on atmospheric rivers." *Geophysical Research Letters* 45, no. 9 (2018): 4299-4308.

(b) Massoud, E. C., V. Espinoza, B. Guan, and D. E. Waliser. "Global climate model ensemble approaches for future projections of atmospheric rivers." *Earth's Future* 7, no. 10 (2019): 1136-1151.

[Response: We thank the reviewer for providing these references, and we appreciate the additional information on how the global climatology of ARs will change in the future. However, because our work is focused regionally on California and because we do not consider the effects of a future climate, we could not find a location in the manuscript to include these additional citations.](#)

### Section 2 Framework Description

#### 2.8)

Line 110: Is this theorem a version of Bayes theorem? How are they related?

Response: The total probability theorem and Bayes' theorem are both applications of the rules of conditional probability, albeit for different purposes. The total probability theorem, seen at Line 110 in the manuscript, states that  $P(A) = \sum_{i=1}^n P(A|B_i) * P(B_i)$  for any set of mutually exclusive, collectively exhaustive events  $B_i$  within the partitioned event space  $B$ . This is used to calculate the overall probability of event  $A$  using information about the conditional probabilities of  $A$  within different partitions of the event space. Bayes' theorem states that  $P(A|B) * P(B) = P(B|A) * P(A)$ . This is a way to use information about one event to update our estimate of the probability of another.

This work relies heavily on the total probability theorem, as it is the foundation of probabilistic risk analysis: we can only know the full spectrum of flood risk outcomes if we individually consider all possible events that could lead to flooding. Bayes' theorem is not as applicable for our use case.

## 2.9)

Line 143: Initially it seems that the AR category score (1-5) is used as input in the PARRA framework. It isn't until later in the manuscript that it becomes clear that AR max IVT and duration are used. The authors should clarify this earlier in the paper.

Response: We appreciate the reviewer identifying this source of confusion. We have revised the paragraph about ARs in Sect. 2.1 to read as follows.

*“The pinch point representing an atmospheric river event (AR) is characterized as a vector with two elements: the maximum recorded integrated water vapor transport (IVT) ( $\text{kg}\cdot\text{m}^{-1}\text{s}^{-1}$ ), and the duration ( $h$ ) of sustained IVT exceeding  $250 \text{ kg}\cdot\text{m}^{-1}\text{s}^{-1}$ . These were chosen as metrics of interest because of their connection to impacts. Based on maximum IVT and duration, the bivariate AR intensity scale proposed by Ralph et al. (2019) ranks ARs from 1–5 to qualitatively summarize their expected severity (from weak to exceptional) and potential consequences (from beneficial to hazardous). Category 1 ARs are classified as primarily beneficial storms, replenishing the water supply without causing adverse effects. Category 5 ARs are classified as primarily hazardous with a high likelihood of flooding and damage.”*

## 2.10)

Line 147: Some precipitation can be from non-AR sources. Is this considered for the calculation of the precipitation submodule in the PARRA framework?

Response: Precipitation from non-AR sources is not included here, because we focus on precipitation that leads to floods and damaging impacts in Sonoma County, and the overwhelming majority of flood damage in Sonoma County is due to ARs (>99%, as referenced in Line 186 of the manuscript). We have added the following sentence to Line 148 to clarify our

scope: *“Only precipitation associated with ARs is included in this analysis.”*

**2.11)**

Line 160: take out the word ‘are’

Response: We have revised according to the reviewer’s suggestion.

Section 3 Case Study: Sonoma County

**2.12)**

Line 235: Is there a citation that shows why WLS can be used to express the relationship between IVT/DUR and PRCP? This seems rather simplistic and not thorough enough to capture the estimated PRCP. According to Figure 4 there seems to be significant spread in these relationships. Perhaps the authors can explain why this choice was made.

Response: The use of a statistical regression to represent the precipitation component model was a subjective implementation choice specific to the Sonoma County case study, and we fit the regression coefficients with WLS instead of OLS because it more accurately captured the heteroskedasticity of the observed data. We believe that the WLS regression accurately captures the distribution of the observed precipitation record, as evidenced by the Q-Q plot in Fig. 4(c) and by the K-S test statistic reported at Line 249 of the manuscript that fails to reject the null hypothesis of different distributions at a 95% confidence level. We intentionally chose a simpler representation of precipitation for a few reasons. For example, we were able to explicitly parameterize the uncertainty, which would not have been possible with a dynamical precipitation model, and we were able to show a range of implementation complexity levels available to framework users. We have further discussed the benefits of stochastic vs. deterministic modeling and the subjective choices within the case study implementation in our responses to comments 2.29 and 2.30, respectively.

We also appreciate the reviewer calling attention to the scatterplots in Fig. 4. Because precipitation is a function of the bivariate statistical relationship between maximum IVT and duration, Figs. 4(a-b) are showing two “flattened” projections of the multidimensional space, and as a result the point clouds look fairly disperse. Based on the reviewer’s comments we have added color scales to Figs. 4(a-b) representing the “flattened” dimension in each. Combined with the regression fit lines at multiple values that were included previously, we believe that this new visualization better shows that the bivariate WLS regression does quite well in capturing the spread of precipitation outcomes.

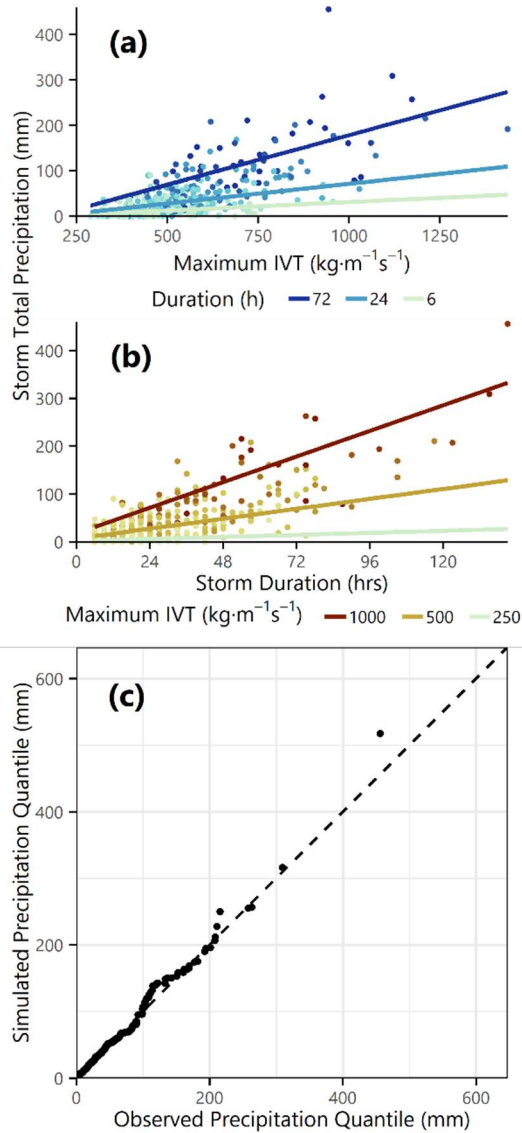

*Revised Figure 4.*

**2.13)**

Line 260: The mean of the distribution is way off here. Should this be a reason for concern? It seems that this methodology begins to break down for extreme AR events.

Response: We believe that the reviewer’s concern about the observed vs. simulated comparison for the February 2019 event has been addressed by the additional contextualization we have presented in the new version of Section 3.2.2, as presented in our response to comment 2.2. We would also like to note that the Q-Q plot in Fig. 4(c) and the K-S test statistic reported at Line 249 are metrics of how well the distribution captures all extremes, not just the February 2019 event, and both metrics support the assertion that the observed precipitation distribution is well represented by the chosen component model implementation.

**2.14)**

Line 266: "... a suitable representation of reality", this is a subjective acceptance criterion, and the authors should note it as so.

Response: We acknowledge the reviewer's suggestion and we have removed this sentence from the manuscript.

**2.15)**

Line 282: Figure 6 is mentioned before Figure 5.

Response: We appreciate the reviewer noticing this inconsistency. We have renumbered the figures so that they are now introduced in numerical order.

**2.16)**

Line 332/Figure 5: The initial peak on Feb 26 is not captured. Can the authors provide some comments and reasoning behind this?

Response: We acknowledge that the early streamflow peak seen in Fig. 5(b) requires more contextualization. We have added a hyetograph of observed precipitation to the figure as shown below. We have also added additional text to the manuscript to contextualize both the early peak and the new hyetograph. The new text starts at Line 332 and reads as follows.

*"The complex shape of the observed streamflow timeseries in Fig. 5(b) is a function of the unique watershed response as well as the spatial and temporal heterogeneity of the input precipitation. By contrast, the simulated distribution is based on the unit hydrograph method, which assumes that the precipitation distribution is uniform and that all runoff enters the channel at a single location. This limits our ability to capture certain kinds of behavior, such as the early peak seen in the observed streamflow timeseries in Fig. 5(b). The early peak could be due to catchment processes that cause a lagged tributary response, input from direct surface runoff, spatial variation in precipitation intensity and duration, or any number of other mechanisms. We include the observed hyetograph to the top of the plot in Fig. 5(b) to show just one aspect of the natural variability that affects the observed timeseries.*

*"Despite the simplification imposed by the unit hydrograph method, though, many metrics of interest are reasonably characterized by the simulated timeseries. The observed peak streamflow ( $1,130 \text{ m}^3\text{s}^{-1}$ ) is at the 43<sup>rd</sup> percentile and the observed floodwave duration (81 h) is at the 63<sup>rd</sup> percentile of the respective simulated distributions. Recall from Sect. 3.2 that the observed precipitation was anomalously high conditioned on the observed atmospheric conditions. We now note that while the observed streamflow may have been high relative to atmospheric conditions, it was in the middle of the predicted distribution conditioned on the observed*

precipitation. Therefore we conclude that the hydrologic routing was likely not one of the physical processes contributing to the “extremeness” of the 2019 event.”

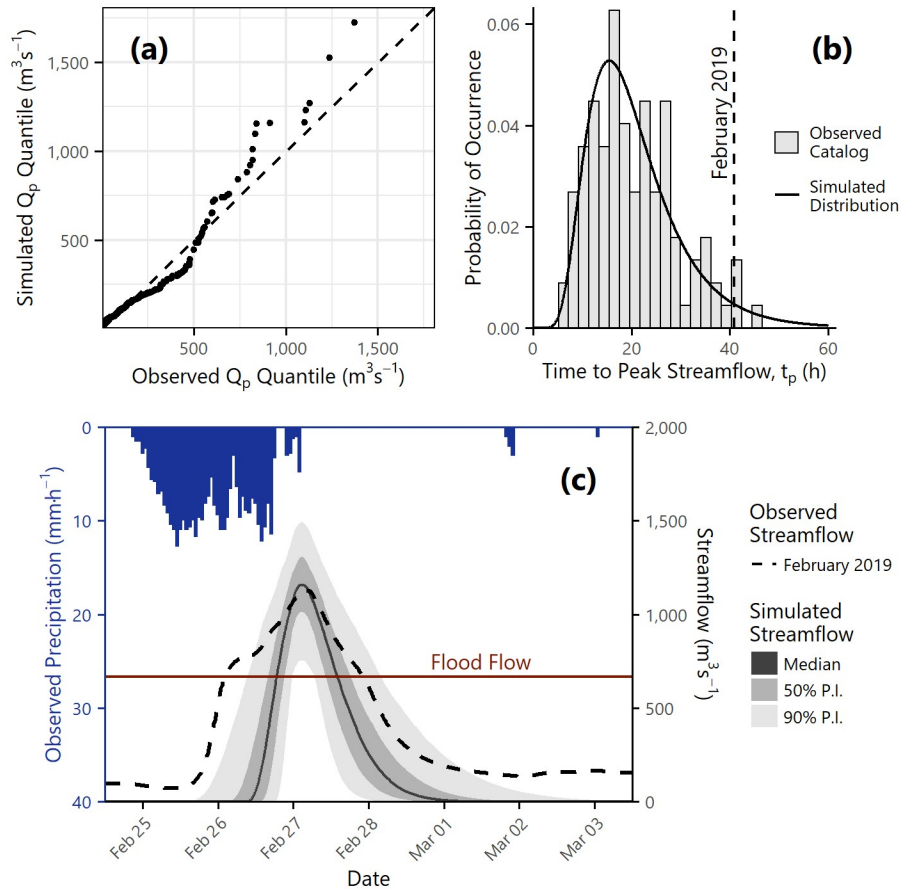

*Revised streamflow figure.*

*Caption: “Streamflow component model. All values are calculated in reference to USGS gage 11463500 (study area inlet). (a) Q–Q plot of observed vs. simulated peak streamflow ( $Q_p$ ) values for all events in the historic catalog. (b) Observed values from the historic catalog values vs. the fitted lognormal distribution for time to peak streamflow ( $t_p$ ). The dashed line indicates the observed time to peak value for the February 2019 event. (c) Distribution of simulated streamflow hydrograph realizations for the February 2019 event. The left axis represents observed hourly precipitation and the right axis represents streamflow. The observed hydrograph timeseries is shown as a black dashed line. The solid line represents the median of the simulated realizations, and the dark and light grey shaded areas represent the 50th and 90th percentile prediction intervals, respectively. The dark red horizontal line indicates the National Weather Service (NWS) flood flow for USGS gage 11463500.*

2.17)

Line 339: This comment is applicable for this section and for other sections. There are several choices that need to be made by the user, such as the LISFLOOD parameters. This raises the question of the PARRA method's applicability to other locations. Does the whole framework need to be re-calibrated with local data for other local case studies?

Response: We thank the reviewer for raising these concerns about both the implementation choices for the Sonoma County case study and the applicability of the PARRA framework to other locations. We have addressed the first concern by strengthening the distinction between the PARRA framework as a risk analysis tool and the proof-of-concept case study implementation of the framework within Sonoma County. In particular we have differentiated “pinch points” vs. “pinch point variables” and “component models” vs. “component model implementations,” where the former is related to the generalized framework and the latter is related to the specific case study, respectively. We believe that understanding these differences is key to understanding the purpose of the manuscript, and we have expanded upon them as follows.

We have added the following paragraph at Line 139 to Sect. 2.1, “Pinch Point Variables.”  
*“The pinch points presented in Sect. 2 are conceptual descriptions of the intermediate system states between AR occurrence and flood loss where only a limited amount of information must be transferred to the next step. Pinch point variables are low-dimensional numerical vectors representing the information recorded at each pinch point (Garrick, 1984). The following paragraphs expand upon the conceptual pinch points and introduce the specific dimensions and measurement units that are used in this paper for each pinch point variable.”*

We have added the following paragraph at Line 173 to Sect. 2.2, “Component Models.”  
*“Throughout this paper we make the distinction between component models, which have been presented thus far in a theoretical sense, and component model implementations. The component model implementations are the choices made by users of the PARRA framework about how a particular physical process will be represented, including what type of model to use (i.e., statistical vs. dynamical), the temporal and spatial resolution of analysis, etc. The state of atmospheric and hydrologic modeling is ever changing, and the “best” implementation choice depends on the modeler, the study area, and the intended end use (Baker et al., 2021). We have intentionally presented the PARRA framework in this section without tying the component models to specific implementations.”*

We have added the following paragraph at Line 181.  
*“The PARRA framework has scientific value as an internally consistent and logically sound structure to connect atmospheric phenomena to community-level impacts. It enables the communication of ideas and results across disparate research fields, isolates the uncertainty associated with different processes within the model chain, and introduces new avenues for interdisciplinary collaboration. By contrast, implementing the PARRA framework for any given*



*location imposes constraints, but also opens the door for practical insights. Site-specific implementations of the PARRA framework and component models are what quantify the probabilistic range of potential risk outcomes and generate actionable insights for stakeholders within case study communities.”*

To address the second concern, we elaborated upon the existing discussion of the framework’s data needs in Sect. 5.3, “Validation Data.” While the framework itself is a performance-based risk analysis tool that does not need calibration, the component model implementations that enable community-level insights do require local data to be meaningful at the local level. Some of the component model implementations presented here would be harder to move to new locations than others; for example, the statistical representation of precipitation with a WLS regression could be easily refit, but the calibrating the hydrodynamic inundation model to a new location would require much more time and effort. The changes and additions we have made to the manuscript to address the reviewer’s concerns are outlined below.

- Line 562: The following sentences have been added.

*“The PARRA framework is a risk analysis tool that is globally applicable and can be used to assess AR flood risk at any scale. However, the implementation of the framework in any location will inherently be case-specific, and local insights require models calibrated to local conditions.”*

- Line 571: The sentence “As a consequence...” has been modified as follows.

*“As a consequence, moving from inundation to damage and from damage to loss are the most uncertain aspects of flood risk assessment due to large uncertainties in the physical mechanisms and the documented difficulties in validating against observed data (Apel et al., 2009; Gerl et al., 2016). Therefore these would be the hardest component models to implement in a new location if the PARRA framework is applied elsewhere.”*

- Line 580: The following sentence has been added.

*“In return, implementing the PARRA framework with fine-resolution local data provides communities with much more relevant information than they would be able to gain from a large-scale regional or global flood risk assessment.”*

## **2.18)**

Line 352: There is no information on which surrogate model was used, and what the accuracy or efficiency of that surrogate model is. In general, there is very little information on this emulation method or how it is used. How can other readers re-produce or build on this analysis if this critical information is missing?

Response: We define and explain many aspects of the surrogate model in Lines 356-365 of the manuscript, which are restated here for convenience. We used the inverse distance weighting spatial interpolation method as our surrogate model to rapidly generate new inundation maps. The predictor variables are  $Q_p$  (peak streamflow,  $m^3s^{-1}$ ) and  $t_p$  (time to peak streamflow, hrs) and the response surface is the full inundation map (depth estimates in meters at 925,000 grid cells). The hyperparameters of the model were fit by ten-fold cross-validation, the error metric was RMSE, and the fitted vertical accuracy was 3.5 cm.

Regarding the reviewer's question about reproducibility: in November 2021 we published extensive code, data, and documentation for the Sonoma County case study on Github, including step-by-step instructions to run every component model and reproduce all data figures, with a particular emphasis on the fit and calibration of LISFLOOD and the surrogate model. The code release is mentioned in the "Code and data availability" section at Line 621 and in the manuscript at Line 349. We have moved the sentence in the manuscript to Line 365 and more explicitly called out the significant effort we have invested into making this work reproducible. The new sentence is as follows:

*"Additional information, including data, documentation, and reproducible code, to replicate the fit and calibration of both LISFLOOD and the surrogate model can be found in the supplemental code release, which is referenced in the "Data and code availability" section at the end of this paper."*

### **2.19)**

Line 440: On correction factors - Again, this seems like a subjective fix for applying the PARRA framework in this region. How can the framework be applied elsewhere using this methodology? Although the framework seems to be useful for Sonoma County, how can the authors show that the methodology can still be efficiently applied for other locations? Some ideas that address this question can be helpful in accepting the PARRA framework as a generally usable framework

Response: Please see our response to comment 2.17, where we discuss the distinction between the PARRA framework and the Sonoma County case study implementation as well as the applicability of the PARRA framework to other locations.

### **2.20)**

Figure 9: The distribution just barely captures the observed event in its tail. As mentioned above, how is this result with its uncertainty reported to a manager or a stakeholder? What is the provided answer here?

Response: Please see our responses to comments 2.2 and 2.4, where we discuss the accuracy of the case study assessment and stakeholder interpretation of the case study results, respectively.

## Section 4 Results

### 2.21)

Line 477: Equation 6 - Is this equation reported anywhere in the literature? Seems like another subjective criteria that the authors implement. There needs to be more information describing this choice.

Response: Eq. 6 is used frequently in risk analysis and is the standard equation for estimating average annual loss (AAL) from empirical data, though we recognize that we should have provided this context for the diverse readers of this manuscript. We now reference the books *Catastrophe Modeling: A New Approach to Managing Risk* (Grossi and Kunreuther, 2005) and *Probabilistic Seismic Hazard and Risk Analysis* (Baker et al., 2021) on Line 478 to provide background on the concept and the calculation of AALs.

### 2.22)

Line 482: The AAL is an interesting concept to describe the average annual losses. However, it is known that this region experiences significant swings between wet and dry years. Is it feasible for the authors to calculate what the AAL is for wet vs dry years?

Response: The AAL is most often used in catastrophe modeling and probabilistic risk analysis as a tool to make long-range decisions about the future: whether to insure, mitigate, develop, etc. at one location versus another, and whether that decision will be profitable over a time horizon of decades to centuries. Because it is only a single value it does not provide much insight into the character of the risk, i.e., whether a location is historically dominated by lots of small losses vs. infrequent large losses, or whether there is high seasonal or interannual variability in the loss record. The simplicity of the metric, though, is what makes it useful for cost-benefit decisions. We have therefore decided not to calculate a conditional AAL for wet vs. dry years because in order to use it for decisionmaking we would need information we do not yet have about the future. For assessing variations from year to year the presented loss exceedance curve is the most relevant result.

### 2.23)

Line 487: What are the uncertainties around these estimates? Do the authors provide this?

Response: We have revised Line 482 to report both a mean estimate and uncertainty bounds. Please note that due to the numerical changes made in response to Reviewer 1 the mean estimate has been revised downward from the original version of the manuscript.

*“The mean AAL estimated from the stochastic record for AR-induced flood losses to residential structures is \$111 million, with 90% confidence that it lies between \$93 and \$133 million.”*

**2.24)**

Line 522: the word ‘the’ is duplicated

Response: We have revised according to the reviewer’s suggestion.

**2.25)**

Line 524: ‘Expected benefits’ - See Massoud et al. 2018, who did a similar analysis for groundwater and investigated how changes to decisions in managing water resources can impact expected changes to groundwater storage. Studies like this are starting to populate the literature.

(a) Massoud, Elias C., Adam J. Purdy, Michelle E. Miro, and James S. Famiglietti. "Projecting groundwater storage changes in California’s Central Valley." *Scientific reports* 8, no. 1 (2018): 1-9.

Response: We thank the reviewer for suggesting this reference. We agree with the reviewer that investigations of decision-making related to future water resource management and the benefits supplied by different water management strategies are certainly becoming more prevalent in the literature. However, we do not see a strong link with this publication to the discussion of our framework, and we did not find a location in the manuscript where a citation would be relevant.

**2.26)**

Line 529: Take out the words ‘is of the 2019’.

Response: We have revised according to the reviewer’s suggestion.

Section 5 Discussion

**2.27)**

Line 535: I would argue that these insights are helpful for planners, managers, and engineers, yet not so helpful for purely scientific investigation since many choices in the framework are purely subjective. I think it is important for the authors to make this clear throughout the paper.

Response: We are glad the reviewer considers our insights to be helpful for planners, managers, and engineers. We believe that the PARRA framework is a novel contribution to the field and that it has intrinsic scientific value as a physically based, modular, probabilistic, and prospective structure to connect atmospheric phenomena to community-level impacts, as stated in Lines 43-

50 and Lines 82-83. We have added new text at Line 616 in the manuscript to highlight these scientific contributions as follows.

*“While the case study showed examples of the specific insights that can be gained from implementing the component models for a community risk assessment, the theory and scientific merit of the PARRA framework stand on their own, independent from the specific benefits and tradeoffs inherent in any local implementation. We have proposed a new method for the structured assessment of AR-driven flood risk that is physically based, modular, probabilistic, and prospective.”*

We have additionally discussed the distinction between the PARRA framework and the Sonoma County case study implementation in our response to comment 2.17, and we have discussed the subjective choices within the case study implementation in our response to comment 2.30.

**2.28)**

Line 543: Another process that can matter here is the role of sequential ARs (i.e., multiple ARs occurring sequentially), something to consider for 'future directions'.

Response: We appreciate the reviewer’s suggestion of a direction for future research. We now mention the role of sequential and compounding events as a potential area for further exploration in the new version of Sect. 3.7.2, which is included in our response to comment 2.2.

**2.29)**

Line 557: Yes, but what did this do to the expected accuracy of capturing the relationships? The framework is trading potential accuracy and confidence for computational efficiency. This introduces even more uncertainty. The authors should state this.

Response: We agree that there are many potential component model implementations, each with different strengths and tradeoffs, that could have been used to capture relationships between variables at each step. However, the purpose of the PARRA framework is not to model one event perfectly, but instead to consider a stochastic range of potential events. We are presenting a modeling approach geared towards a different analysis procedure (Monte Carlo simulation) and end goal (probabilistic risk assessment) than that of deterministic modeling. We have expanded the discussion of implementation considerations in Sect. 5.2, “Framework Implementation,” to better explain the value of the performance-based probabilistic approach.

- Line 548: The following paragraph has been added.

*“The PARRA framework represents one end of the continuum between stochastic and deterministic modeling. It will not perform as well as a high-fidelity multi-scale physics model calibrated to a given set of input forcings for a specific scenario event, and it is not intended to*

*replace existing models designed for that use case. However, it is impossible to scale the granular analysis performed by deterministic models to produce a probabilistic estimate of flood risk across a range of potential AR events (Apel et al., 2004; Savage et al., 2016). The PARRA framework thus serves a fundamentally different purpose within the literature of risk—if deterministic modeling gives us the best possible representation of a single tree, then the PARRA framework aims to characterize the shape and scale of the entire forest.”*

- Line 548: The sentence “Another strength of the PARRA framework...” has been modified as follows.

*“A key functionality of the PARRA framework is its ability to track and quantify uncertainty across multiple component models.”*

- Line 554: The sentence “We made several implementation decisions...” has been modified as follows.

*“We came up with several practical solutions to minimize the computational expense of the PARRA framework and bring it into the range of procedural feasibility without compromising accuracy.”*

### **2.30)**

Line 582: Component Model Alternatives - This is where some of the subjective choices of the framework can be replaced with more objective choices, and therefore can make the framework more sound for scientific analysis.

Response: We agree with the reviewer that the choices made to implement the PARRA framework were subjective choices made to optimize a specific set of priorities. However, choosing priorities (speed vs. complexity, local insights vs. broader trends, etc.) and making implementation choices that optimize for those priorities will always be a subjective process, and we believe there is no objective or “correct” implementation choice for any component model in the PARRA framework. We believe that the PARRA framework is sound for scientific analysis as presented, and we have added the following paragraph to Sect. 5.4, “Component Model Alternatives” at Line 582 to highlight this.

*“All models are imperfect representations of the physical world, and there will always be some nuance lost when moving from theory (the framework) to practice (the implementation). There are multiple possible methods to characterize some of the pinch points that would improve fidelity to the underlying physical processes but would increase computational demand and therefore constrain the representation of the true uncertainty. These inherent tradeoffs between different types of error are unavoidable, but point to a major strength of the PARRA framework: that the user is able to explicitly define their own optimization criteria and choose the component*

*model implementations that best suit their personal expertise, resource constraints, and end goals.”*

**2.31)**

Line 589: the word ‘the’ is duplicated

Response: We have revised according to the reviewer’s suggestion.

**2.32)**

Line 591: the word ‘underlying’ is duplicated

Response: We have revised according to the reviewer’s suggestion.

Section 6 Conclusions

**2.33)**

Line 594: Is it possible/feasible to test another case study event that the PARRA framework accurately estimates the damages for? This can help show case the value of the PARRA framework even more than just showing the one case study from 2019 that was barely captured in the tail of the distribution.

Response: Please see our responses to comments 2.2 and 2.4, where we discuss the accuracy of the case study assessment and stakeholder interpretation of the case study results, respectively.

**2.34)**

Line 608: ‘... event fell within the expected probabilistic range ...’, In the tail of the distribution. It was barely captured. The authors should be careful with how they communicate the accuracy of the provided result.

Response: Please see our responses to comments 2.2 and 2.4, where we discuss the accuracy of the case study assessment and stakeholder interpretation of the case study results, respectively.
